## Review Article

# Cross-talk between energy and redox metabolism in astrocyte-neuron functional cooperation

 Angeles Almeida<sup>1,2</sup>, Daniel Jimenez-Blasco<sup>1,2,3</sup> and  Juan P. Bolaños<sup>1,2,3</sup>

<sup>1</sup>Instituto de Biología Funcional y Genómica (IBFG), Universidad de Salamanca, CSIC, Salamanca, Spain; <sup>2</sup>Instituto de Investigación Biomédica de Salamanca (IBSAL), Hospital Universitario de Salamanca, Universidad de Salamanca, CSIC, Salamanca, Spain; <sup>3</sup>Centro de Investigación Biomédica en Red de Fragilidad y Envejecimiento Saludable (CIBERFES), Madrid, Spain

**Correspondence:** Angeles Almeida (aaparra@usal.es) or Daniel Jimenez-Blasco (danijb@usal.es) or Juan P. Bolaños (jbolanos@usal.es)

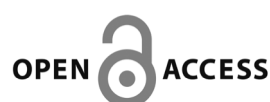

Astrocytes show unique anatomical, morphological, and metabolic features to take up substrates from the blood and metabolize them for local delivery to active synapses to sustain neuron function. In the present review, we specifically focus on key molecular aspects of energy and redox metabolism that facilitate this astrocyte-neuronal coupling in a controlled manner. Basal glycolysis is co-ordinated by the anaphase-promoting complex/cyclosome (APC/C)-Cdh1, a ubiquitin ligase that targets the proglycolytic enzyme 6-phosphofructokinase-2,6-bisphosphatase-3 (PFKFB3) for degradation. APC/C-Cdh1 activity is more robust in neurons than in astrocytes, which determine that PFKFB3 abundance and glycolytic rate are weaker in neurons. The low PFKFB3 activity in neurons facilitates glucose-6-phosphate oxidation via the pentose-phosphate pathway, which promotes antioxidant protection. Conversely, the high PFKFB3 activity in astrocytes allows the production and release of glycolytic lactate, which is taken up by neurons that use it as an oxidizable substrate. Importantly, the mitochondrial respiratory chain is tighter assembled in neurons than in astrocytes, thus the bioenergetic efficiency of mitochondria is higher in neurons. Because of this, the production of reactive oxygen species (mROS) by mitochondrial complex I is very low in neurons and very high in astrocytes. Such a naturally occurring high abundance of mROS in astrocytes physiologically determines a specific transcriptional fingerprint that contributes to sustaining cognitive performance. We conclude that the energy and redox metabolism of astrocytes must complementarily match that of neurons to regulate brain function and animal welfare.

## Introduction

The high-energy supply required for neuronal activity has been classically related to the use of glucose as the brain's main energy substrate [1,2], along with the consumption of almost 20% of inhaled O<sub>2</sub> [3]. These high-energy costs depend closely on metabolic involvement with astrocytes for energy control and redox homeostasis [4,5], given their role as essential partners for neurotransmission and behavior [6,7]. To do this, astrocytes form a syncytium by establishing cellular processes to contact blood capillaries with neuronal soma and synapses. Together with abundant gap junctions, such processes account for an abundant exchange of intermediates that cover the energetic and metabolic demands in the nervous system [2]. This astrocyte-neuron metabolic coupling is clearly observed during glutamatergic neurotransmission, where astrocytes efficiently take up neuronal-derived glutamate from the synaptic space through Na<sup>+</sup>-dependent active transporters [8]. Therefore, glutamate uptake is energy-costly for astrocytes and occurs at the expense of ATP, used to restore the Na<sup>+</sup> gradient by the Na<sup>+</sup>/K<sup>+</sup> ATPase pump [9,10]. In astrocytes, intracellular glutamate may follow at least two distinct metabolic fates, its conversion to  $\alpha$ -ketoglutarate for oxidation within mitochondria through the tricarboxylic acid cycle (TCA), or its conversion in glutamine by glutamine synthetase, absent from neurons, to be released and taken up by neighboring neurons, which

Received: 29 September 2022  
 Revised: 31 January 2023  
 Accepted: 01 February 2023

Version of Record published:  
 03 March 2023

convert it back to glutamate by glutaminase. Importantly, the activation of the Na<sup>+</sup>/K<sup>+</sup> ATPase pump is paralleled by an increase in glucose uptake [11,12] and coupled with glycolysis in astrocytes [13].

Brain glycolysis is mainly regulated by the E3 ubiquitin ligase anaphase-promoting complex/cyclosome (APC/C)-Cdh1, which targets the key regulatory glycolytic enzyme 6-phosphofructo-2-kinase/fructose-2,6-bisphosphatase-3 (PFKFB3) for proteasomal degradation [14,15]. In contrast with neurons, the low APC/C-Cdh1 activity in astrocytes triggers PFKFB3 stabilization and a high glycolytic activity to provide lactate as a bioenergetic substrate to neurons [14]. These findings have been confirmed worldwide by many laboratories, both in primary cells and *in vivo*, and their importance in health and disease have been established [16–20]. Conversely, the mitochondrial respiratory chain is tighter assembled in neurons than in astrocytes. Thus, neurons depend mainly on the mitochondrial oxidative phosphorylation (OXPHOS) to fulfil their energy demands, while astrocytes mostly rely on glycolysis for energy production [21–24]. Nevertheless, astrocytic mitochondria are important organelles both for energy and signaling purposes [25]. Consequently, the redox homeostasis in both neurons and astrocytes is different, although they are tightly coupled to sustain neurotransmission. Moreover, astrocytes provide antioxidant defence to neurons, which is essential to prevent neurodegeneration [24]. Thus, the bioenergetics and redox cooperation between neurons and astrocytes regulate neuronal survival, brain function, and animal welfare, which might provide new therapeutic targets to fight against neurodegenerative diseases.

## Glycolysis is complementarily regulated in astrocytes and neurons

Glycolysis is mainly regulated by the enzymatic activities of hexokinase, 6-phosphofructo-1-kinase (PFK1), and pyruvate kinase (PK). In astrocytes, PFK1-specific activity is approximately fourfold than found in neurons, and the levels of PFK1 powerful allosteric activator, fructose-2,6-bisphosphate (F2,6P<sub>2</sub>) is twofold [14]. F2,6P<sub>2</sub> synthesis is controlled in astrocytes mainly by the isoform 3 of the PFKFB enzyme (PFKFB3) [14]. Interestingly, PFKFB3 has a high, approximately 700-fold kinase versus bisphosphatase ratio [26]. Hence, PFKFB3 levels are directly proportional to F2,6-P<sub>2</sub>-synthesizing activity. PFKFB3 knockdown abolishes the ability of astrocytes to up-regulate glycolysis upon mitochondrial inhibition, suggesting that PFKFB3 is important to maintain the glycolytic phenotype of astrocytes [14]. However, PFKFB3 is virtually absent from neurons, because of the continuous destabilization by the ubiquitin-proteasome pathway [24,27] (Figure 1). Thus, only the PFKFB3 isoform contains a <sup>142</sup>Lys-Glu-Asn (*KEN*) *box* that targets it for ubiquitination by APC/C-Cdh1 [27], which is an E3 ubiquitin ligase known for its role in the regulation of mitosis, meiosis [28], tumor suppression, and genome stability [29]. APC/C-Cdh1 regulates important functions in neurons, such as axonal growth [30–32], cortical neurogenesis [33], and survival [34–36]. In cortical neurons, Cdh1 knockdown leads to PFKFB3 accumulation, which is sufficient to increase glycolysis [27]. This was the first observation to describe a role for a cell cycle-related protein (APC/C-Cdh1) in metabolism, mimicked by PFKFB3 full-length cDNA overexpression [27]. In contrast, Cdh1 protein levels and APC/C-Cdh1 ubiquitylating activity are very low in astrocytes, which explains their high levels of PFKFB3 and glycolytic activity [27]. In neurons, the index of glucose that is oxidized in the TCA cycle after having been converted into pyruvate, analyzed as the rate of [6-<sup>14</sup>C] glucose incorporated into <sup>14</sup>CO<sub>2</sub>, is negligible when compared with astrocytes [27,37]. In addition, glycolysis, assessed as the rate of <sup>3</sup>H<sub>2</sub>O formation from [3-<sup>3</sup>H] glucose and thus accurately reflecting the flux of glucose through glycolysis [38], is approximately four- to fivefold slower in neurons than in astrocytes [27]. It seems, therefore, that the neuronal capacity to perform glycolysis is limited. Interestingly, the overactivation of glutamatergic receptors, which inhibits APC/C-Cdh1 via cyclin-dependent kinase-5 (Cdk5)-p25 [35], stabilizes PFKFB3 and other substrates, as cyclin B1 and Rock2 [39], causing neuronal metabolic switch and apoptotic death [35,36]. Altogether, these results suggest that full activation of glycolysis is dangerous for neurons. In contrast, glycolysis flux is strongly up-regulated in astrocytes, either upon inhibition of mitochondrial respiration by, e.g., nitric oxide or cyanide via 5'-AMP-activated protein kinase (AMPK)-mediated activation of PFKFB3 [14,23], or upon nitric oxide-dependent hypoxia-inducible factor-1α (HIF1α) activation, which causes enhanced expression of most glycolytic enzymes including PFKFB3 [40].

## Neuronal function depends on astrocytic glucose metabolism

Astrocytes store glycogen [41], which, after glycogenolysis, serves to supply lactate as an energy substrate for neurons; in contrast, lactate oxidative utilization is comparatively less efficient in astrocytes [42]. Astrocytes lack the mitochondrial aspartate/glutamate carrier, which reduces the ability of these cells to use the malate/aspartate shuttle to transfer NADH-reducing equivalents to mitochondria as a mechanism to recover cytosolic NAD<sup>+</sup>. Therefore, in these cells, the pyruvate-to-lactate conversion becomes a predominant system to regenerate the cytosolic NAD<sup>+</sup> via lactate dehydrogenase isoform-5 (LDH5), needed to keep active the glycolytic flux [41]. Neurons, in contrast, are more efficient

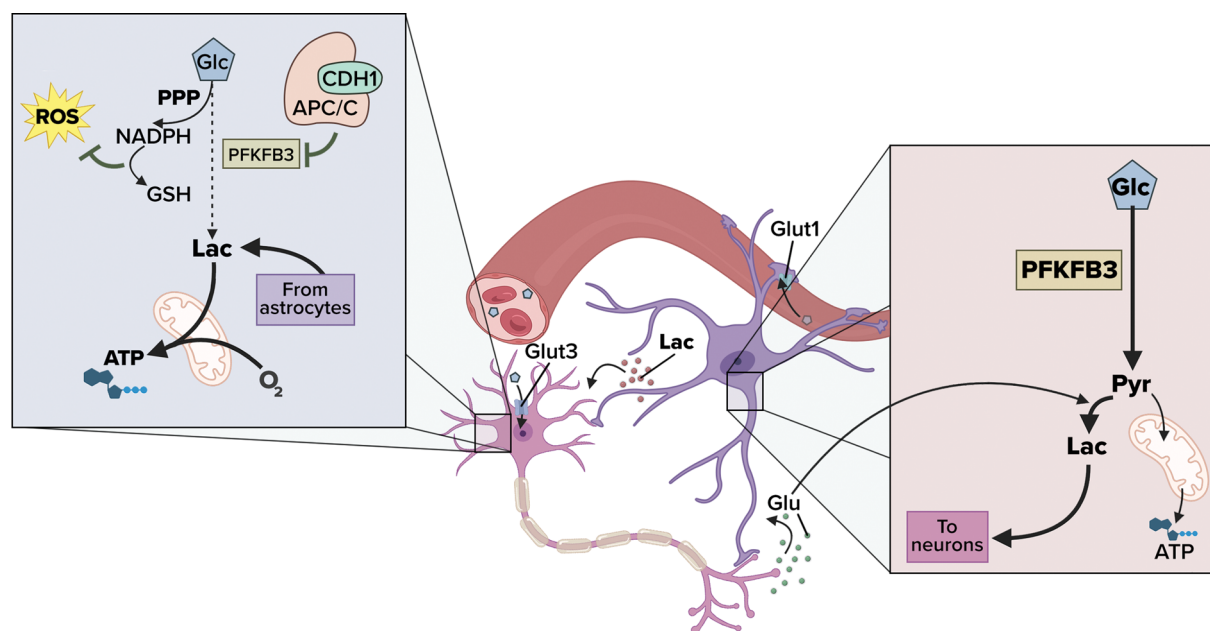

**Figure 1. The metabolism of astrocytes matches that of neurons**

Glycolysis is regulated, amongst other factors, by the ubiquitin ligase APC/C-Cdh1, which targets the proglycolytic enzyme PFKFB3 for proteasomal degradation in neurons. In astrocytes, APC/C-Cdh1 activity is low, allowing PFKFB3 stabilization and higher glycolysis. In neurons, low glycolysis allows glucose conversion into PPP to sustain antioxidant protection, whereas in astrocytes, high glycolysis releases lactate that may be used by neurons.

cells to converting lactate to pyruvate through the LDH1 isoform. Altogether, these metabolic differences between astrocytes and neurons help explaining their adaption to couple their metabolism and to transferring lactate from the glial to the neuronal compartment [41], sustaining the bases for the astrocyte-neuron lactate shuttle (ANLS) model [9,43] (Figure 1). *In vivo* evidence for the occurrence of ANLS [44] strongly suggests that it constitutes an evolutionarily well-preserved mechanism of neuronal survival [45]. Importantly, altered ANLS that occurs with dysfunctional monocarboxylate transporter-4 and -2 (MCT4 and MCT2), responsible for the lactate release from astrocytes or uptake by neurons, and lactate content in the brain has been described in Alzheimer's disease [2,46,47]. Thus, memory formation requires energy, which is provided by learning-dependent regulations of glucose metabolism pathways [48–51]. Interestingly, glucose metabolism shifts as the brain matures [18]. While the adult hippocampus preferentially employs glycogenolysis and astrocyte-neuronal lactate-mediated coupling, the juvenile hippocampus selectively requires, in addition to higher astrocyte-neuronal lactate transport, a direct neuronal glucose transport and a functional PFKFB3 in neurons [18]. Furthermore, the expression of APC/C-Cdh1 in juvenile hippocampal neurons was inverse when compared with adult neurons [18]. This substantial increase in neuronal glucose metabolism may explain the significantly higher levels of excitability, synaptogenesis, and synapse pruning during development [52] and may protect them from death that could be otherwise caused by their high rate of oxidative phosphorylation [18].

## Redox control of neurons depends on their own glucose metabolism

The phenomenon of neurotransmission not only is a highly energetically expensive process but it is associated with a high production of reactive oxygen species (ROS) derived from different sources, which generally involves  $\text{Ca}^{2+}$  influx and glutamatergic stimulation [4,53,54]. For this reason, the antioxidant systems of neurons must be effective in dealing with these high levels of ROS to which they are subjected. To do this, unlike astrocytes, neurons derive a substantial proportion of glucose consumption through the pentose phosphate pathway (PPP), responsible for regenerating the levels of NADPH necessary for the efficient reduction in glutathione (GSH), the most abundant antioxidant in the brain [24,27,38]. GSH is mostly synthesized in astrocytes by two steps, catalyzed by glutamate-cysteine ligase (GCL) and glutathione synthetase (GSS) [55,56]. Neurons also use this biosynthetic machinery to resynthesize GSH, although with a lower abundance, by capturing amino acid precursors resulting from the degradation of astrocytic

GSH [55–57]. The loss of a robust antioxidant capacity in neurons is related to the cognitive impairment associated with certain neurodegenerative diseases that concur with the loss of GSH [58,59]. Interestingly, a proportion of Parkinson's disease (PD) patients harbor gene mutations that encode for the PTEN-induced kinase 1 (PINK1)-Parkin axis, which is critical to regulate mitophagy [60]. Loss of PINK1 activity induces ROS that may lead to the stabilization of HIF1 $\alpha$ , a master up-regulator of glycolysis [61]. While high glycolytic rates are related to increased growth and proliferation of astrocytes in patients with PD [62], a greater glycolytic flow in neurons leads to a detriment of the PPP and reduced GSH [27]. This metabolic switch could help explaining neuronal death in PD and other neurodegenerative diseases coursing with impairment mitophagy, such as Batten disease [16]. Given the need to maintain proper GSH levels to preserve neuronal function, increasing GSH concentration may therefore be a strong strategy to provide neuroprotection [63,64]. This occurs, even if complete conversion to GSH is not achieved, and its immediate precursor,  $\gamma$ -glutamylcysteine can still be used by glutathione peroxidase (GPx) to confer protection against neuronal loss and motor impairment [65].

## The astrocyte-neuron glutathione shuttle couples neurotransmission with neuronal antioxidant protection

The master regulator of the antioxidant response in the brain is the transcriptional activator of nuclear erythroid-related factor 2 (Nrf2) [66–69]. Nrf2 governs the transcription of a wide spectrum of antioxidant enzymes, not only those required for the GSH pathway, such as GCL and GPx, but other enzymes such as heme oxygenase-1 (HO-1), thioredoxin (Trx), NAD(P)H dehydrogenase quinone (Nqo-1), and enzymes involved in NADPH regeneration [70–72]. The poor antioxidant response and increased susceptibility of neurons to ROS are largely due to the continued degradation and destabilization of Nrf2 by the Cullin3-Kelch-like ECH-associated protein 1 (Cul3-KEAP1) complex. Under basal conditions, Nrf2 binds to the redox sensor KEAP1, which, in the absence of ROS, allows the interaction of Nrf2 with E3 ubiquitin ligase Cul3, for its polyubiquitination and subsequent proteasomal degradation. After the accumulation of ROS, the oxidation of key cysteine residues in KEAP1 takes place to induce a conformational change in the Cul3-KEAP1 complex, allowing nuclear translocation and transcriptional activity of Nrf2 [72,73]. Here, Nrf2 induces the expression of genes whose promoters contain its binding site, referred to as the antioxidant response element (ARE) [74]. In neurons, levels of Nrf2 decline by a mechanism involving the epigenetic repression of the Nrf2 promoter leading to histone hypoacetylation around the Nrf2 transcription start site, making these cells especially vulnerable to ROS [75]. However, Nrf2 is more stabilized in astrocytes making them primarily responsible for the removal of ROS in the nervous system, since antioxidants are not only mainly synthesized in astrocytes but have also been shown to supply them to adjacent neurons in both *in vitro* and *in vivo* models [70,76]. For this reason, astrocytes are key to providing antioxidant capacity to neurons, although neurons are also able to induce the expression of antioxidant genes in an Nrf2-independent manner through the interpretation of Ca<sup>2+</sup> signals [77–79].

In astrocytes, the activation of glutamatergic receptors (GluR), mainly N-methyl-D-aspartate receptors (NMDAR), triggers a signal transduction pathway involving phospholipase C mediated by the release of Ca<sup>2+</sup> from the endoplasmic reticulum and the subsequent activation of protein kinase C $\delta$  (PKC $\delta$ ). The activation of this kinase promotes, by phosphorylation, the stabilization of p35, a cofactor of Cdk5. In the cytosol, the active Cdk5-p35 complex phosphorylates Nrf2 on the residues Thr<sup>395</sup>, Ser<sup>433</sup>, and Thr<sup>439</sup>, which is enough to promote the translocation of Nrf2 to the nucleus and induce the expression of the antioxidant machinery [70]. This astrocytic pathway provides an antioxidant reserve that neurons use for ROS detoxification. The increase in intracellular Ca<sup>2+</sup> produced, following excessive activation of NMDARs by glutamate, is known as an excitotoxic response that could lead to neuronal death when unresolved [35,80]. The neuronal activity involves an astrocyte response that entails, among other antioxidant mechanisms, *de novo* biosynthesis of GSH and its release to neurons through the astrocyte-neuron glutathione shuttle (ANGS) [24]. Therefore, this intercellular communication via NMDAR couples neurotransmission with neuronal survival, as demonstrated during ischemic preconditioning [81].

## The mitochondrial energy efficiency of astrocytes impacts on redox signaling and organismal welfare

In recent years, numerous findings have changed the current view of how neural cells produce ROS and what are their function within the nervous system. Despite being considered deleterious by-products, ROS have now been shown to be essential for proper metabolic and redox coupling. To understand this issue, we should look at the regulation of the OXPHOS. One of the main differential characteristics between neurons and astrocytes is that neurons depend



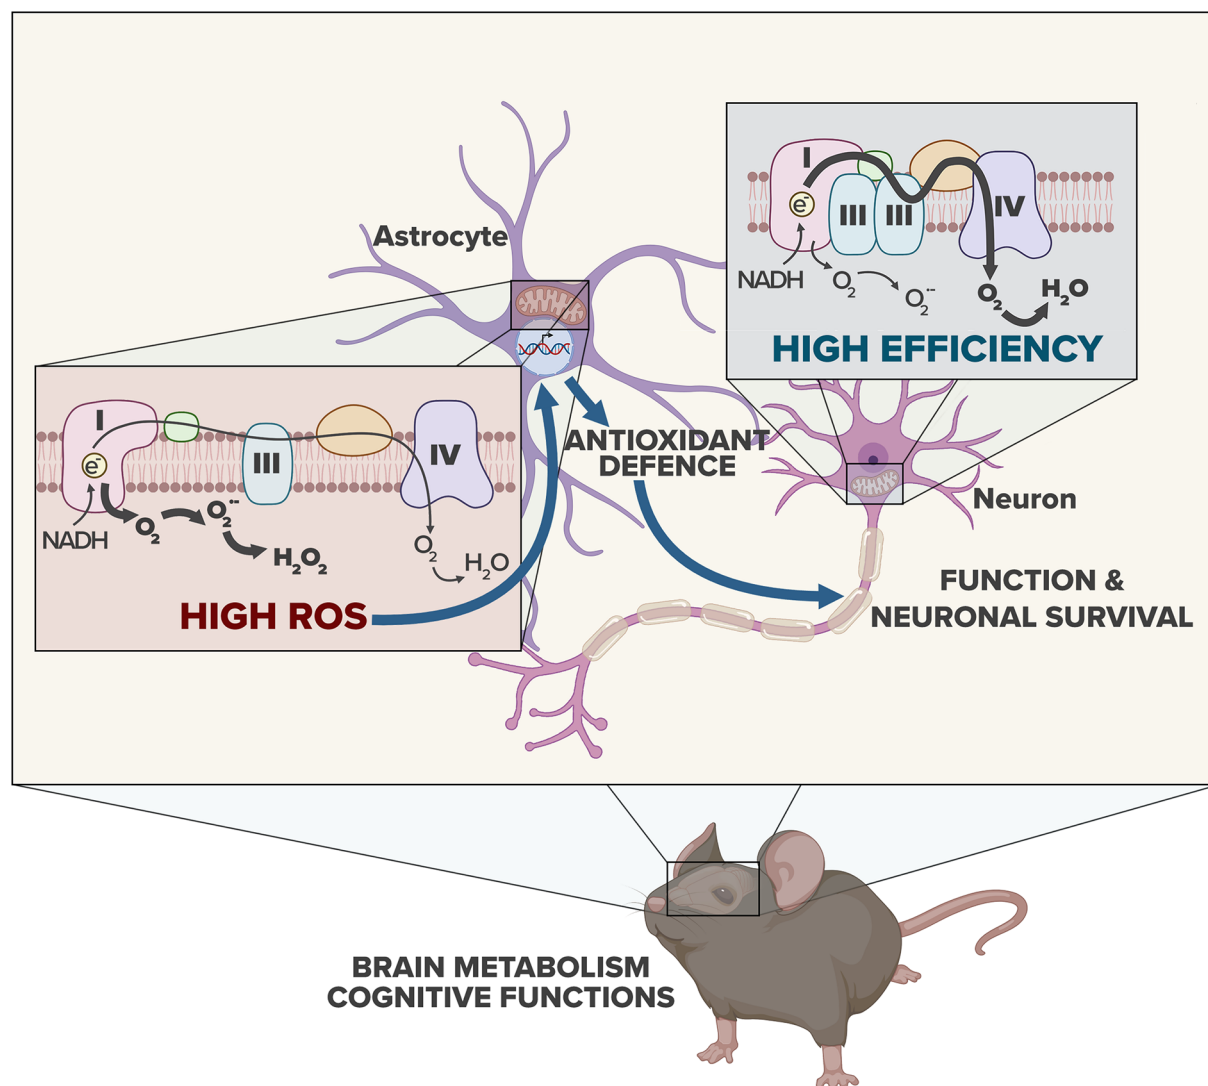

**Figure 2. Astrocytic mitochondrial ROS physiologically regulates metabolism and behavior**

The mitochondrial respiratory chain is poorly assembled in astrocytes, which determines a low bioenergetic efficiency, but a high mitochondrial ROS (mROS) production. The high abundance of mROS in astrocytes actively promotes a transcriptional program that contributes to sustaining energy and redox metabolism, impacting on mouse cognitive performance. In contrast, the higher assembly of the mitochondrial respiratory chain in neurons determines higher energy efficiency and lower mROS production in these cells.

mainly on OXPHOS to fulfil their energy requirements, while astrocytes mainly rely on glycolysis for energy production [21–24]. Mitochondria are considered the main producers of ROS within the cell [82]. Thus, along with other enzymatic sources within mitochondria [83], increased ROS production emerges from electron transfer through mitochondrial complexes during OXPHOS [82]. To account for an efficient function of the electron transport chain (ETC) and ATP production from respiration, respiratory complexes are assembled into quaternary structures called respiratory supercomplexes (RSCs) [84,85]. Surprisingly, astrocytes barely assemble CI to CIII and CIV to form RSCs, presenting most of the CI disassembled. However, neurons have most of their complexes assembled in RSC, housing CI, CIII, and CIV [25,85] (Figure 2). The less active, free CI of astrocytes, accounts for less efficient respiration along with a significant increase in ROS production [25]. In free CI, the flavin mononucleotide containing the NDUFV1 subunit is more available to interact with  $O_2$  [85]. In this scenario, the generation of superoxide anion ( $O_2^{\cdot -}$ ) is carried out since the ETC is in an oxidized state [86], with a low efficiency to consume  $O_2$  from NADH substrates in astrocytes, compared with neurons. In a model of targeted expression of catalase to the mitochondria, astrocytic ROS

was attenuated *in vivo* and was shown to regulate brain metabolism, neuronal function, and organismal behavior [87]. Moreover, the impact of astrocytic mitochondrial ROS on behavior was also confirmed in a different biological environment. Thus, the production of astrocytic mitochondrial ROS can be reduced *in vivo* by the activation of cannabinoid-1 receptors that are present in mitochondria (mtCB1) [88]. This decrease in astrocytic mitochondrial ROS, by down-regulating HIF1 $\alpha$ , attenuates the glycolytic flow and lactate release to neurons, causing neuronal bioenergetic deficit and social impairment [88]. Therefore, these concepts are in line with hormesis, defined as the process of adaptive response to a persistent, but not lethal, stressful stimulus that generates in the cell resistance to such stress, probably due to a greater antioxidant capacity [89–91]. This fact could explain how astrocytes are prepared to efficiently manage oxidative stress and how redox homeostasis constitutes a clear example of compartmentalization of neural cells that is closely related to brain metabolism [87].

## Summary

- Ubiquitin ligase APC/C-Cdh1 co-ordinates astrocyte-neuron metabolic coupling by promoting PFKFB3 destabilization and attenuation of glycolysis in neurons, facilitating PPP activity for antioxidant protection.
- In astrocytes, APC/C-Cdh1 activity is very low resulting in PFKFB3 stabilization and higher basal glycolytic rate and lactate release.
- The mitochondrial respiratory chain is tighter assembled in neurons than in astrocytes, which determines higher bioenergetic efficiency and lower mROS production in the neurons.
- The weaker assembly of the mitochondrial respiratory chain in astrocytes determines lower bioenergetic efficiency and higher mROS production in these cells.
- Astrocytic mROS promote a transcriptional signature that contributes to sustaining the metabolic and redox metabolism and brain function.

## Competing Interests

The authors declare that there are no competing interests associated with the manuscript.

## Funding

This work was supported by the Agencia Estatal de Investigación [grant numbers PID2019-105699RB-I00/AEI/10.13039/501100011033, PDC2021-121013-I00, RED2018-102576-T (to J.P.B.)]; Plan Nacional de Drogas [grant number 2020I028 (to J.P.B.)]; Instituto de Salud Carlos III [grant numbers PI21/00727, RD21/0006/0005 cofunded by the European Union (to A.A.)]; and Junta de Castilla y León [grant number CS/151P20 cofunded by P.O. FEDER (to A.A.)]; Apoyo Regional a la Competitividad Empresarial, [grant number ICE 04/18/LE/0017 (to J.P.B.)]; and Escalera de Excelencia [grant number CLU-2017-03 (to J.P.B. and A.A.)]. D.J.B. is a recipient of a Juan de la Cierva-Incorporación contract [grant number IJC2020-044230-I].

## Author Contribution

A.A. and J.P.B. defined the review focus. D.J.B. collected data from the literature and wrote the manuscript. A.A. and J.P.B. designed the artwork and reviewed the manuscript draft. All the authors edited and approved the submitted version of the manuscript.

## Acknowledgements

The authors acknowledge Dr. Jesus Agulla for his help in designing the figures.

## Abbreviations

AMPK, 5'-AMP-activated protein kinase; ANG2, astrocyte-neuron glutathione shuttle; ANLS, astrocyte-neuron lactate shuttle; APC/C, anaphase-promoting complex/cyclosome; ARE, antioxidant response element; CB1, cannabinoid-1 receptor; Cdk5, cyclin-dependent kinase-5; Cul3, Cullin3; ETC, electron transport chain; F2,6P<sub>2</sub>, fructose-2,6-bisphosphate; GCL,

glutamate-cysteine ligase; GluR, glutamatergic receptor; GPx, glutathione peroxidase; GSH, reduced glutathione; GSS, glutathione synthetase; HIF1 $\alpha$ , hypoxia-inducible factor-1 $\alpha$ ; HO-1, heme oxygenase-1; KEAP1, Kelch-like ECH-associated protein 1; LDH, lactate dehydrogenase; MCT, monocarboxylate transporter; mROS, mitochondrial reactive oxygen species; NMDA, N-methyl-D-aspartate; Nqo-1, NAD(P)H dehydrogenase quinone; Nrf2, nuclear erythroid-related factor 2; OXPHOS, mitochondrial oxidative phosphorylation; PD, Parkinson's disease; PFK1, 6-phosphofructo-1-kinase; PFKFB3, 6-phosphofructo-2-kinase/fructosa-2,6-bisphosphatase-3; PINK1, PTEN-induced kinase 1; PK, protein kinase; PPP, pentose phosphate pathway; RSC, respiratory supercomplex; TCA, tricarboxylic acid cycle; Trx, thioredoxin.

## References

- Hertz, L., Peng, L. and Dienel, G.A. (2007) Energy metabolism in astrocytes: high rate of oxidative metabolism and spatiotemporal dependence on glycolysis/glycogenolysis. *J. Cereb. Blood Flow Metab.* **27**, 219–249, <https://doi.org/10.1038/sj.jcbfm.9600343>
- Jha, M.K. and Morrison, B.M. (2018) Glia-neuron energy metabolism in health and diseases: new insights into the role of nervous system metabolic transporters. *Exp. Neurol.* **309**, 23–31, <https://doi.org/10.1016/j.expneurol.2018.07.009>
- Magistretti, P.J. and Allaman, I. (2015) A cellular perspective on brain energy metabolism and functional imaging. *Neuron* **86**, 883–901, <https://doi.org/10.1016/j.neuron.2015.03.035>
- Almeida, A. and Bolaños, J.P. (2001) A transient inhibition of mitochondrial ATP synthesis by nitric oxide synthase activation triggered apoptosis in primary cortical neurons. *J. Neurochem.* **77**, 676–690, <https://doi.org/10.1046/j.1471-4159.2001.00276.x>
- Nortley, R. and Attwell, D. (2017) Control of brain energy supply by astrocytes. *Curr. Opin. Neurobiol.* **47**, 80–85, <https://doi.org/10.1016/j.conb.2017.09.012>
- Perea, G., Sur, M. and Araque, A. (2014) Neuron-glia networks: integral gear of brain function. *Front. Cell. Neurosci.* **8**, 378, <https://doi.org/10.3389/fncel.2014.00378>
- Oliveira, J.F., Sardinha, V.M., Guerra-Gomes, S., Araque, A. and Sousa, N. (2015) Do stars govern our actions? Astrocyte involvement in rodent behavior. *Trends Neurosci.* **38**, 535–549, <https://doi.org/10.1016/j.tins.2015.07.006>
- Allen, N.J. and Barres, B.A. (2009) Neuroscience: Glia - more than just brain glue. *Nature* **457**, 675–677, <https://doi.org/10.1038/457675a>
- Pellerin, L. and Magistretti, P.J. (1994) Glutamate uptake into astrocytes stimulates aerobic glycolysis: a mechanism coupling neuronal activity to glucose utilization. *Proc. Natl. Acad. Sci. U.S.A.* **91**, 10625–10629, <https://doi.org/10.1073/pnas.91.22.10625>
- Bolaños, J.P. and Almeida, A. (2006) Nitric oxide in glial cells. *Antioxid. Redox Signal.* **8**, 955–965, <https://doi.org/10.1089/ars.2006.8.955>
- Loaiza, A., Porras, O.H. and Barros, L.F. (2003) Glutamate triggers rapid glucose transport stimulation in astrocytes as evidenced by real-time confocal microscopy. *J. Neurosci.* **23**, 7337–7342, <https://doi.org/10.1523/JNEUROSCI.23-19-07337.2003>
- Porras, O.H., Ruminot, I., Loaiza, A. and Barros, L.F. (2008) Na(+)-Ca(2+) cosignaling in the stimulation of the glucose transporter GLUT1 in cultured astrocytes. *Glia* **56**, 59–68, <https://doi.org/10.1002/glia.20589>
- Bittner, C.X., Valdebenito, R., Ruminot, I., Loaiza, A., Larenas, V., Sotelo-Hitschfeld, T. et al. (2011) Fast and reversible stimulation of astrocytic glycolysis by K<sup>+</sup> and a delayed and persistent effect of glutamate. *J. Neurosci.* **31**, 4709–4713, <https://doi.org/10.1523/JNEUROSCI.5311-10.2011>
- Almeida, A., Moncada, S. and Bolaños, J.P. (2004) Nitric oxide switches on glycolysis through the AMP protein kinase and 6-phosphofructo-2-kinase pathway. *Nat. Cell Biol.* **6**, 45–51, <https://doi.org/10.1038/ncb1080>
- Almeida, A. (2012) Regulation of APC/C-Cdh1 and its function in neuronal survival. *Mol. Neurobiol.* **46**, 547–554, <https://doi.org/10.1007/s12035-012-8309-2>
- Lopez-Fabuel, I., Garcia-Macia, M., Buondelmonte, C., Burmistrova, O., Bonora, N., Alonso-Batan, P. et al. (2022) Aberrant upregulation of the glycolytic enzyme PFKFB3 in CLN7 neuronal ceroid lipofuscinosis. *Nat. Commun.* **13**, 536, <https://doi.org/10.1038/s41467-022-28191-1>
- Burmistrova, O., Olias-Arjona, A., Lapresa, R., Jimenez-Blasco, D., Eremeeva, T., Shishov, D. et al. (2019) Targeting PFKFB3 alleviates cerebral ischemia-reperfusion injury in mice. *Sci. Rep.* **9**, 11670, <https://doi.org/10.1038/s41598-019-48196-z>
- Cruz, E., Bessieres, B., Magistretti, P. and Alberini, C.M. (2022) Differential role of neuronal glucose and PFKFB3 in memory formation during development. *Glia* **70**, 2207–2231, <https://doi.org/10.1002/glia.24248>
- Li, Z., Zhang, B., Yao, W., Zhang, C., Wan, L. and Zhang, Y. (2019) APC-Cdh1 regulates neuronal apoptosis through modulating glycolysis and pentose-phosphate pathway after oxygen-glucose deprivation and reperfusion. *Cell. Mol. Neurobiol.* **39**, 123–135, <https://doi.org/10.1007/s10571-018-0638-x>
- Fu, W., Shi, D., Westaway, D. and Jhamandas, J.H. (2015) Bioenergetic mechanisms in astrocytes may contribute to amyloid plaque deposition and toxicity. *J. Biol. Chem.* **290**, 12504–12513, <https://doi.org/10.1074/jbc.M114.618157>
- Almeida, A. and Medina, J.M. (1997) Isolation and characterization of tightly coupled mitochondria from neurons and astrocytes in primary culture. *Brain Res.* **764**, 167–172, [https://doi.org/10.1016/S0006-8993\(97\)00453-8](https://doi.org/10.1016/S0006-8993(97)00453-8)
- Almeida, A., Almeida, J., Bolaños, J.P. and Moncada, S. (2001) Different responses of astrocytes and neurons to nitric oxide: the role of glycolytically-generated ATP in astrocyte protection. *Proc. Natl. Acad. Sci. U.S.A.* **98**, 15294–15299, <https://doi.org/10.1073/pnas.261560998>
- Bolaños, J.P., Almeida, A. and Moncada, S. (2010) Glycolysis: a bioenergetic or a survival pathway? *Trends Biochem. Sci.* **35**, 145–149, <https://doi.org/10.1016/j.tibs.2009.10.006>
- Bolanos, J.P. (2016) Bioenergetics and redox adaptations of astrocytes to neuronal activity. *J. Neurochem.* **139**, 115–125, <https://doi.org/10.1111/jnc.13486>
- Lopez-Fabuel, I., Le Douce, J., Logan, A., James, A.M., Bonvento, G., Murphy, M.P. et al. (2016) Complex I assembly into supercomplexes determines differential mitochondrial ROS production in neurons and astrocytes. *Proc. Natl. Acad. Sci. U.S.A.* **113**, 13063–13068, <https://doi.org/10.1073/pnas.1613701113>

- 26 Pilkis, S.J., Claus, T.H., Kurland, I.J. and Lange, A.J. (1995) 6-Phosphofructo-2-kinase/fructose-2,6-bisphosphatase: a metabolic signaling enzyme. *Annu. Rev. Biochem.* **64**, 799–835, <https://doi.org/10.1146/annurev.bi.64.070195.004055>
- 27 Herrero-Mendez, A., Almeida, A., Fernandez, E., Maestre, C., Moncada, S. and Bolanos, J.P. (2009) The bioenergetic and antioxidant status of neurons is controlled by continuous degradation of a key glycolytic enzyme by APC/C-Cdh1. *Nat. Cell Biol.* **11**, 747–752, <https://doi.org/10.1038/ncb1881>
- 28 Pesin, J.A. and Orr-Weaver, T.L. (2008) Regulation of APC/C activators in mitosis and meiosis. *Annu. Rev. Cell Dev. Biol.* **24**, 475–499, <https://doi.org/10.1146/annurev.cellbio.041408.115949>
- 29 Garcia-Higuera, I., Manchado, E., Dubus, P., Canamero, M., Mendez, J., Moreno, S. et al. (2008) Genomic stability and tumour suppression by the APC/C cofactor Cdh1. *Nat. Cell Biol.* **10**, 802–811, <https://doi.org/10.1038/ncb1742>
- 30 Konishi, Y., Stegmüller, J., Matsuda, T., Bonni, S. and Bonni, A. (2004) Cdh1-APC controls axonal growth and patterning in the mammalian brain. *Science* **303**, 1026–1030, <https://doi.org/10.1126/science.1093712>
- 31 Harmey, D., Smith, A., Simanski, S., Moussa, C.Z. and Ayad, N.G. (2009) The anaphase promoting complex induces substrate degradation during neuronal differentiation. *J. Biol. Chem.* **284**, 4317–4323, <https://doi.org/10.1074/jbc.M804944200>
- 32 Huynh, M.A., Stegmüller, J., Litterman, N. and Bonni, A. (2009) Regulation of Cdh1-APC function in axon growth by Cdh1 phosphorylation. *J. Neurosci.* **29**, 4322–4327, <https://doi.org/10.1523/JNEUROSCI.5329-08.2009>
- 33 Delgado-Esteban, M., Garcia-Higuera, I., Maestre, C., Moreno, S. and Almeida, A. (2013) APC/C-Cdh1 coordinates neurogenesis and cortical size during development. *Nat. Commun.* **4**, 2879, <https://doi.org/10.1038/ncomms3879>
- 34 Almeida, A., Bolanos, J.P. and Moreno, S. (2005) Cdh1/Hct1-APC is essential for the survival of postmitotic neurons. *J. Neurosci.* **25**, 8115–8121, <https://doi.org/10.1523/JNEUROSCI.1143-05.2005>
- 35 Maestre, C., Delgado-Esteban, M., Gomez-Sanchez, J.C., Bolanos, J.P. and Almeida, A. (2008) Cdk5 phosphorylates Cdh1 and modulates cyclin B1 stability in excitotoxicity. *EMBO J.* **27**, 2736–2745, <https://doi.org/10.1038/emboj.2008.195>
- 36 Veas-Perez de Tudela, M., Delgado-Esteban, M., Maestre, C., Bobo-Jimenez, V., Jimenez-Blasco, D., Vecino, R. et al. (2015) Regulation of Bcl-xL-ATP synthase interaction by mitochondrial cyclin B1-cyclin-dependent kinase-1 determines neuronal survival. *J. Neurosci.* **35**, 9287–9301, <https://doi.org/10.1523/JNEUROSCI.4712-14.2015>
- 37 Garcia-Nogales, P., Almeida, A. and Bolanos, J.P. (2003) Peroxynitrite protects neurons against nitric oxide-mediated apoptosis. A key role for glucose-6-phosphate dehydrogenase activity in neuroprotection. *J. Biol. Chem.* **278**, 864–874, <https://doi.org/10.1074/jbc.M206835200>
- 38 Bouzier-Sore, A.K. and Bolanos, J.P. (2015) Uncertainties in pentose-phosphate pathway flux assessment underestimate its contribution to neuronal glucose consumption: relevance for neurodegeneration and aging. *Front. Aging Neurosci.* **7**, 89, <https://doi.org/10.3389/fnagi.2015.00089>
- 39 Lapresa, R., Agulla, J., Gonzalez-Guerrero, S., Bolanos, J.P. and Almeida, A. (2022) Amyloid-beta induces Cdh1-mediated rock2 stabilization causing neurodegeneration. *Front. Pharmacol.* **13**, 884470, <https://doi.org/10.3389/fphar.2022.884470>
- 40 Brix, B., Mesters, J.R., Pellerin, L. and Jochen, O. (2012) Endothelial cell-derived nitric oxide enhances aerobic glycolysis in astrocytes via HIF-1 $\alpha$ -mediated target gene activation. *J. Neurosci.* **32**, 9727–9735, <https://doi.org/10.1523/JNEUROSCI.0879-12.2012>
- 41 Pellerin, L. and Magistretti, P.J. (2012) Sweet sixteen for ANLS. *J. Cereb. Blood Flow Metab.* **32**, 1152–1166, <https://doi.org/10.1038/jcbfm.2011.149>
- 42 Bouzier-Sore, A.K., Voisin, P., Bouchaud, V., Bezanson, E., Franconi, J.M. and Pellerin, L. (2006) Competition between glucose and lactate as oxidative energy substrates in both neurons and astrocytes: a comparative NMR study. *Eur. J. Neurosci.* **24**, 1687–1694, <https://doi.org/10.1111/j.1460-9568.2006.05056.x>
- 43 Magistretti, P.J. and Allaman, I. (2018) Lactate in the brain: from metabolic end-product to signalling molecule. *Nat. Rev. Neurosci.* **19**, 235–249, <https://doi.org/10.1038/nrn.2018.19>
- 44 Machler, P., Wyss, M.T., Elsayed, M., Stobart, J., Gutierrez, R., von Faber-Castell, A. et al. (2016) *In vivo* evidence for a lactate gradient from astrocytes to neurons. *Cell Metab.* **23**, 94–102, <https://doi.org/10.1016/j.cmet.2015.10.010>
- 45 Volkenhoff, A., Weiler, A., Letzel, M., Stehling, M., Klamt, C. and Schirmeier, S. (2015) Glial glycolysis is essential for neuronal survival in *Drosophila*. *Cell Metab.* **22**, 437–447, <https://doi.org/10.1016/j.cmet.2015.07.006>
- 46 Lu, W., Huang, J., Sun, S., Huang, S., Gan, S., Xu, J. et al. (2015) Changes in lactate content and monocarboxylate transporter 2 expression in A $\beta$ <sub>25–35</sub>-treated rat model of Alzheimer's disease. *Neurol. Sci.* **36**, 871–876, <https://doi.org/10.1007/s10072-015-2087-3>
- 47 Perkins, M., Wolf, A.B., Chavira, B., Shonebarger, D., Meckel, J.P., Leung, L. et al. (2016) Altered energy metabolism pathways in the posterior cingulate in young adult apolipoprotein E varepsilon4 carriers. *J. Alzheimers Dis.* **53**, 95–106, <https://doi.org/10.3233/JAD-151205>
- 48 Gibbs, M.E., Hutchinson, D. and Hertz, L. (2008) Astrocytic involvement in learning and memory consolidation. *Neurosci. Biobehav. Rev.* **32**, 927–944, <https://doi.org/10.1016/j.neubiorev.2008.02.001>
- 49 Descalzi, G., Gao, V., Steinman, M.Q., Suzuki, A. and Alberini, C.M. (2019) Lactate from astrocytes fuels learning-induced mRNA translation in excitatory and inhibitory neurons. *Commun. Biol.* **2**, 247, <https://doi.org/10.1038/s42003-019-0495-2>
- 50 Netzhualcoyotzi, C. and Pellerin, L. (2020) Neuronal and astroglial monocarboxylate transporters play key but distinct roles in hippocampus-dependent learning and memory formation. *Prog. Neurobiol.* **194**, 101888, <https://doi.org/10.1016/j.pneurobio.2020.101888>
- 51 Roumes, H., Jolle, C., Blanc, J., Benkhaled, I., Chatain, C.P., Massot, P. et al. (2021) Lactate transporters in the rat barrel cortex sustain whisker-dependent BOLD fMRI signal and behavioral performance. *Proc. Natl. Acad. Sci. U.S.A.* **118**, <https://doi.org/10.1073/pnas.2112466118>
- 52 van Dyck, L.I. and Morrow, E.M. (2017) Genetic control of postnatal human brain growth. *Curr. Opin. Neurol.* **30**, 114–124, <https://doi.org/10.1097/WCO.0000000000000405>
- 53 Mattson, M.P. and Liu, D. (2002) Energetics and oxidative stress in synaptic plasticity and neurodegenerative disorders. *Neuromolecular Med.* **2**, 215–231, <https://doi.org/10.1385/NMM.2:2:215>
- 54 Cai, Q. and Sheng, Z.H. (2009) Molecular motors and synaptic assembly. *Neuroscientist* **15**, 78–89, <https://doi.org/10.1177/1073858408329511>
- 55 Dringen, R., Pfeiffer, B. and Hamprecht, B. (1999) Synthesis of the antioxidant glutathione in neurons: supply by astrocytes of CysGly as precursor for neuronal glutathione. *J. Neurosci.* **19**, 562–569, <https://doi.org/10.1523/JNEUROSCI.19-02-00562.1999>



- 56 Quintana-Cabrera, R. and Bolanos, J.P. (2013) Glutathione and gamma-glutamylcysteine in hydrogen peroxide detoxification. *Methods Enzymol.* **527**, 129–144, <https://doi.org/10.1016/B978-0-12-405882-8.00007-6>
- 57 Fernandez-Fernandez, S., Almeida, A. and Bolanos, J.P. (2012) Antioxidant and bioenergetic coupling between neurons and astrocytes. *Biochem. J.* **443**, 3–11, <https://doi.org/10.1042/BJ20111943>
- 58 Henchcliffe, C. and Beal, M.F. (2008) Mitochondrial biology and oxidative stress in Parkinson disease pathogenesis. *Nat. Clin. Pract. Neurol.* **4**, 600–609, <https://doi.org/10.1038/ncpneu0924>
- 59 Fernandez-Fernandez, S., Bobo-Jimenez, V., Requejo-Aguilar, R., Gonzalez-Fernandez, S., Resch, M., Carabias-Carrasco, M. et al. (2018) Hippocampal neurons require a large pool of glutathione to sustain dendrite integrity and cognitive function. *Redox Biol.* **19**, 52–61, <https://doi.org/10.1016/j.redox.2018.08.003>
- 60 Whitworth, A.J. and Pallanck, L.J. (2017) PINK1/Parkin mitophagy and neurodegeneration-what do we really know *in vivo*? *Curr. Opin. Genet. Dev.* **44**, 47–53, <https://doi.org/10.1016/j.gde.2017.01.016>
- 61 Requejo-Aguilar, R., Lopez-Fabuel, I., Fernandez, E., Martins, L.M., Almeida, A. and Bolanos, J.P. (2014) PINK1 deficiency sustains cell proliferation by reprogramming glucose metabolism through HIF1. *Nat. Commun.* **5**, 4514, <https://doi.org/10.1038/ncomms5514>
- 62 Prestel, J., Gempel, K., Hauser, T.K., Schweitzer, K., Prokisch, H., Ahting, U. et al. (2008) Clinical and molecular characterisation of a Parkinson family with a novel PINK1 mutation. *J. Neurol.* **255**, 643–648, <https://doi.org/10.1007/s00415-008-0763-4>
- 63 Shih, A.Y., Johnson, D.A., Wong, G., Kraft, A.D., Jiang, L., Erb, H. et al. (2003) Coordinate regulation of glutathione biosynthesis and release by Nrf2-expressing glia potently protects neurons from oxidative stress. *J. Neurosci.* **23**, 3394–3406, <https://doi.org/10.1523/JNEUROSCI.23-08-03394.2003>
- 64 Diaz-Hernandez, J.I., Almeida, A., Delgado-Esteban, M., Fernandez, E. and Bolanos, J.P. (2005) Knockdown of glutamate-cysteine ligase by small hairpin RNA reveals that both catalytic and modulatory subunits are essential for the survival of primary neurons. *J. Biol. Chem.* **280**, 38992–39001, <https://doi.org/10.1074/jbc.M507065200>
- 65 Quintana-Cabrera, R., Fernandez-Fernandez, S., Bobo-Jimenez, V., Escobar, J., Sastre, J., Almeida, A. et al. (2012) gamma-Glutamylcysteine detoxifies reactive oxygen species by acting as glutathione peroxidase-1 cofactor. *Nat. Commun.* **3**, 718, <https://doi.org/10.1038/ncomms1722>
- 66 Zhu, H., Jia, Z., Zhang, L., Yamamoto, M., Misra, H.P., Trush, M.A. et al. (2008) Antioxidants and phase 2 enzymes in macrophages: regulation by Nrf2 signaling and protection against oxidative and electrophilic stress. *Exp. Biol. Med. (Maywood)* **233**, 463–474, <https://doi.org/10.3181/0711-RM-304>
- 67 Higgins, L.G., Kelleher, M.O., Eggleston, I.M., Itoh, K., Yamamoto, M. and Hayes, J.D. (2009) Transcription factor Nrf2 mediates an adaptive response to sulforaphane that protects fibroblasts in vitro against the cytotoxic effects of electrophiles, peroxides and redox-cycling agents. *Toxicol. Appl. Pharmacol.* **237**, 267–280, <https://doi.org/10.1016/j.taap.2009.03.005>
- 68 Dreger, H., Westphal, K., Weller, A., Baumann, G., Stangl, V., Meiners, S. et al. (2009) Nrf2-dependent upregulation of antioxidative enzymes: a novel pathway for proteasome inhibitor-mediated cardioprotection. *Cardiovasc. Res.* **83**, 354–361, <https://doi.org/10.1093/cvr/cvp107>
- 69 Hayes, J.D. and Dinkova-Kostova, A.T. (2014) The Nrf2 regulatory network provides an interface between redox and intermediary metabolism. *Trends Biochem. Sci.* **39**, 199–218, <https://doi.org/10.1016/j.tibs.2014.02.002>
- 70 Jimenez-Blasco, D., Santofimia-Castano, P., Gonzalez, A., Almeida, A. and Bolanos, J.P. (2015) Astrocyte NMDA receptors' activity sustains neuronal survival through a Cdk5-Nrf2 pathway. *Cell Death Differ.* **22**, 1877–1889, <https://doi.org/10.1038/cdd.2015.49>
- 71 Bell, K.F., Al-Mubarak, B., Martel, M.A., McKay, S., Wheelan, N., Hasel, P. et al. (2015) Neuronal development is promoted by weakened intrinsic antioxidant defences due to epigenetic repression of Nrf2. *Nat. Commun.* **6**, 7066, <https://doi.org/10.1038/ncomms8066>
- 72 Tonelli, C., Chio, I.I.C. and Tuveson, D.A. (2018) Transcriptional regulation by Nrf2. *Antioxid. Redox Signal.* **29**, 1727–1745, <https://doi.org/10.1089/ars.2017.7342>
- 73 Kobayashi, A., Kang, M.I., Watai, Y., Tong, K.I., Shibata, T., Uchida, K. et al. (2006) Oxidative and electrophilic stresses activate Nrf2 through inhibition of ubiquitination activity of Keap1. *Mol. Cell. Biol.* **26**, 221–229, <https://doi.org/10.1128/MCB.26.1.221-229.2006>
- 74 Hayes, J.D., McMahon, M., Chowdhry, S. and Dinkova-Kostova, A.T. (2010) Cancer chemoprevention mechanisms mediated through the Keap1-Nrf2 pathway. *Antioxid. Redox Signal.* **13**, 1713–1748, <https://doi.org/10.1089/ars.2010.3221>
- 75 Bell, K.F., Fowler, J.H., Al-Mubarak, B., Horsburgh, K. and Hardingham, G.E. (2011) Activation of Nrf2-regulated glutathione pathway genes by ischemic preconditioning. *Oxid. Med. Cell Longev.* **2011**, 689524, <https://doi.org/10.1155/2011/689524>
- 76 Habas, A., Hahn, J., Wang, X. and Margeta, M. (2013) Neuronal activity regulates astrocytic Nrf2 signaling. *Proc. Natl. Acad. Sci. U.S.A.* **110**, 18291–18296, <https://doi.org/10.1073/pnas.1208764110>
- 77 Lewerenz, J. and Maher, P. (2011) Control of redox state and redox signaling by neural antioxidant systems. *Antioxid. Redox Signal.* **14**, 1449–1465, <https://doi.org/10.1089/ars.2010.3600>
- 78 Deighton, R.F., Markus, N.M., Al-Mubarak, B., Bell, K.F., Papadia, S., Meakin, P.J. et al. (2014) Nrf2 target genes can be controlled by neuronal activity in the absence of Nrf2 and astrocytes. *Proc. Natl. Acad. Sci. U.S.A.* **111**, E1818–E1820, <https://doi.org/10.1073/pnas.1402097111>
- 79 Qiu, J., Dando, O., Febery, J.A., Fowler, J.H., Chandran, S. and Hardingham, G.E. (2020) Neuronal activity and its role in controlling antioxidant genes. *Int. J. Mol. Sci.* **21**, 1933, <https://doi.org/10.3390/ijms21061933>
- 80 Rodriguez-Rodriguez, P., Almeida, A. and Bolanos, J.P. (2013) Brain energy metabolism in glutamate-receptor activation and excitotoxicity: role for APC/C-Cdh1 in the balance glycolysis/pentose phosphate pathway. *Neurochem. Int.* **62**, 750–756, <https://doi.org/10.1016/j.neuint.2013.02.005>
- 81 Bell, K.F., Al-Mubarak, B., Fowler, J.H., Baxter, P.S., Gupta, K., Tsujita, T. et al. (2011) Mild oxidative stress activates Nrf2 in astrocytes, which contributes to neuroprotective ischemic preconditioning. *Proc. Natl. Acad. Sci. U.S.A.* **108**, E1–E2, author reply E3–4, <https://doi.org/10.1073/pnas.1015229108>
- 82 Murphy, M.P. (2009) How mitochondria produce reactive oxygen species. *Biochem. J.* **417**, 1–13, <https://doi.org/10.1042/BJ20081386>
- 83 Brand, M.D. (2010) The sites and topology of mitochondrial superoxide production. *Exp. Gerontol.* **45**, 466–472, <https://doi.org/10.1016/j.exger.2010.01.003>

- 84 Chaban, Y., Boekema, E.J. and Dudkina, N.V. (2014) Structures of mitochondrial oxidative phosphorylation supercomplexes and mechanisms for their stabilisation. *Biochim. Biophys. Acta* **1837**, 418–426, <https://doi.org/10.1016/j.bbabi.2013.10.004>
- 85 Enriquez, J.A. (2016) Supramolecular organization of respiratory complexes. *Annu. Rev. Physiol.* **78**, 533–561, <https://doi.org/10.1146/annurev-physiol-021115-105031>
- 86 Genova, M.L. and Lenaz, G. (2015) The interplay between respiratory supercomplexes and ROS in aging. *Antioxid. Redox Signal.* **23**, 208–238, <https://doi.org/10.1089/ars.2014.6214>
- 87 Vicente-Gutierrez, C., Bonora, N., Bobo-Jimenez, V., Jimenez-Blasco, D., Lopez-Fabuel, I., Fernandez, E. et al. (2019) Astrocytic mitochondrial ROS modulate brain metabolism and mouse behaviour. *Nat. Metab.* **1**, 201–211, <https://doi.org/10.1038/s42255-018-0031-6>
- 88 Jimenez-Blasco, D., Busquets-Garcia, A., Hebert-Chatelain, E., Serrat, R., Vicente-Gutierrez, C., Ioannidou, C. et al. (2020) Glucose metabolism links astroglial mitochondria to cannabinoid effects. *Nature* **583**, 603–608, <https://doi.org/10.1038/s41586-020-2470-y>
- 89 Schieber, M. and Chandel, N.S. (2014) ROS function in redox signaling and oxidative stress. *Curr. Biol.* **24**, R453–R462, <https://doi.org/10.1016/j.cub.2014.03.034>
- 90 Schulz, T.J., Zarse, K., Voigt, A., Urban, N., Birringer, M. and Ristow, M. (2007) Glucose restriction extends *Caenorhabditis elegans* life span by inducing mitochondrial respiration and increasing oxidative stress. *Cell Metab.* **6**, 280–293, <https://doi.org/10.1016/j.cmet.2007.08.011>
- 91 Lopez-Otin, C., Blasco, M.A., Partridge, L., Serrano, M. and Kroemer, G. (2013) The hallmarks of aging. *Cell* **153**, 1194–1217, <https://doi.org/10.1016/j.cell.2013.05.039>
